# Supplementary material for: Enhanced Cell Proliferation and Osteogenesis Differentiation through a Combined Treatment of Poly-L-Lysine-Coated PLGA/Graphene Oxide Hybrid Fiber Matrices and Electrical Stimulation
Source: Hindawi journal article supplement (doi:10.1155/2020/5892506), 2020-02-15
Supplement: f1 [file 5892506.f1.doc]

**Support information for**

[**Enhanced cell proliferation and osteogenesis differentiation through**](http://apps.webofknowledge.com/full_record.do?product=UA&search_mode=GeneralSearch&qid=39&SID=5D618Pb2IedF6tdjiIC&page=1&doc=6&cacheurlFromRightClick=no) **a combined treatment of Poly-L-lysine coated PLGA/****graphene oxide hybrid fibre matrices and electrical stimulation**

Jiaqi Zhu1,2#, Zhiping Qi1#, Changjun Zheng1, Chuan Fu1, Su Pan1*, Xiaoyu Yang1*

1 Department of Orthopedic Surgery, the Second Hospital of Jilin University, Ziqiang Street No. 218, Changchun TX: 130041, PR China

2 Department of Obstetrics and Gynecology, the Second Hospital of Jilin University, Ziqiang Street No. 218, Changchun TX: 130041, PR China

Current Address: Department of Orthopedic Surgery, the Second Hospital of Jilin University, Ziqiang Street No. 218, Changchun TX: 130041, PR China

#These authors contributed equally to this work.

*Corresponding Author

E-mail: spineps@sina.com (PS);

E-mail:yangxiaoy@jlu.edu.cn (YXY);

**Supplementary Figures**

**Fig. S1** TEM images of GO nanoparticles. Bar lengths are 1μm.


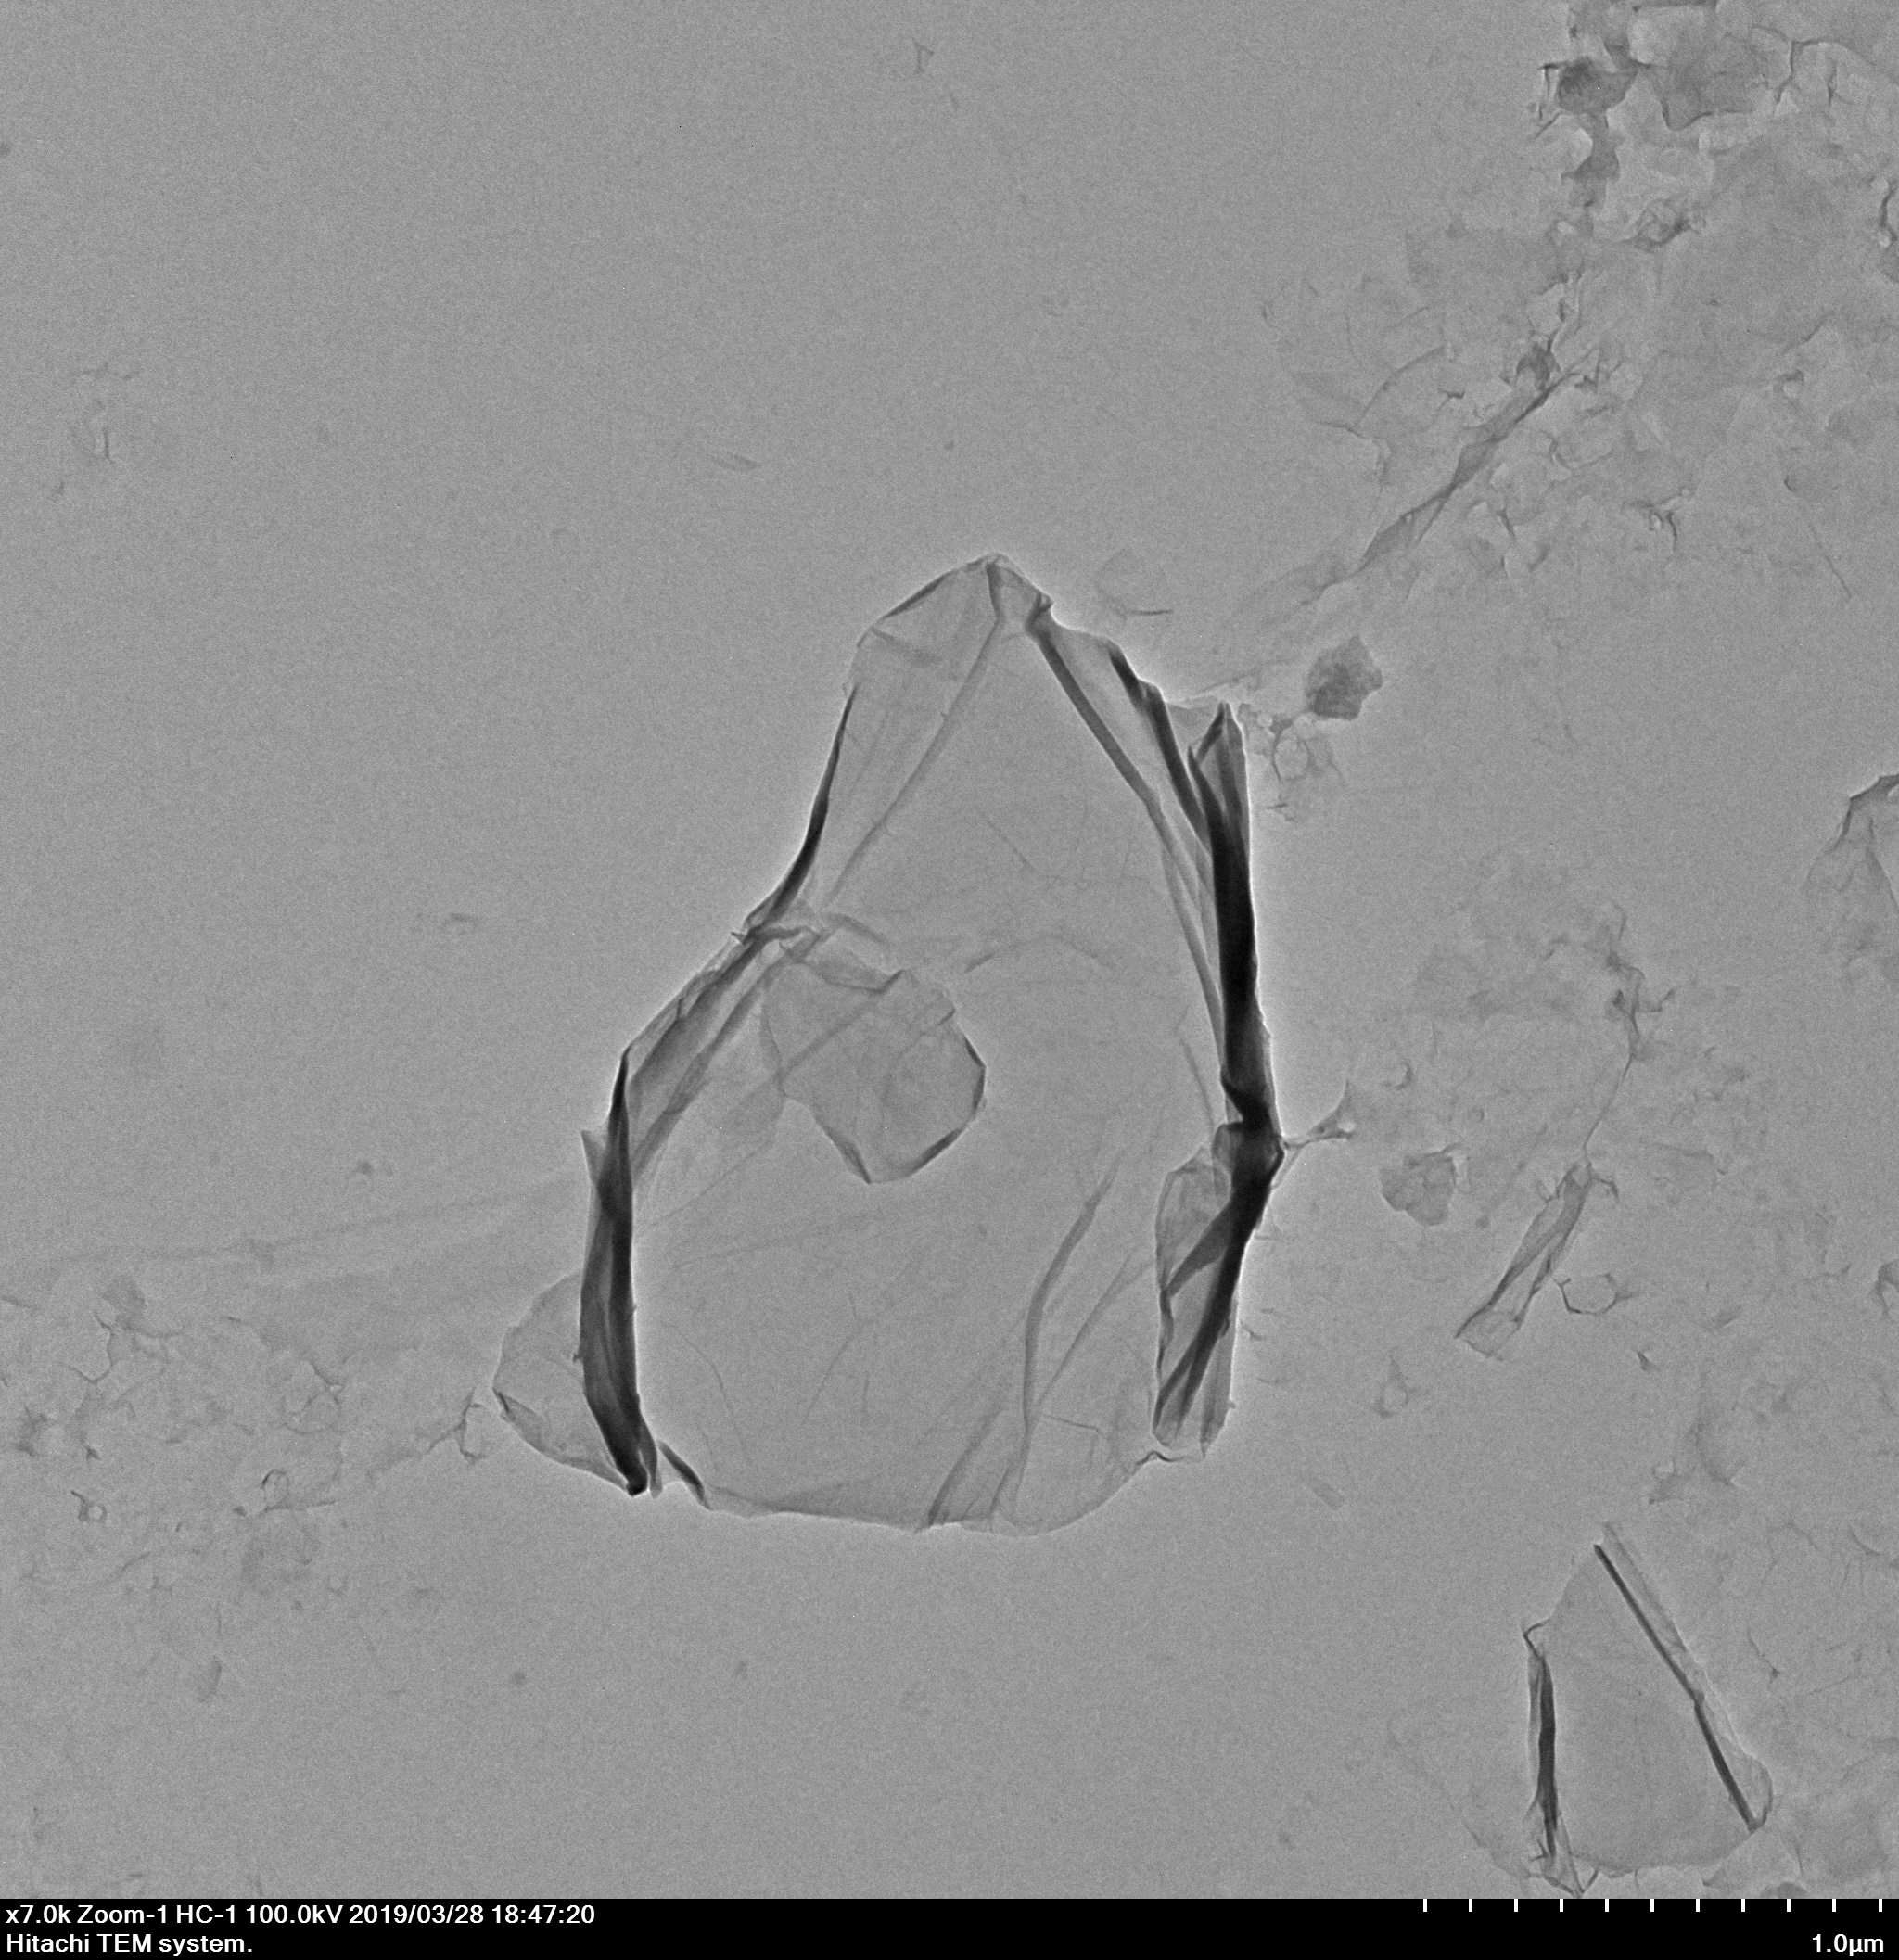


**Supplementary Methods**

**TEM images of GO nanoparticles**

Morphology and structure of the GO nanoparticles were observed with transmission electron microscopy (TEM) (HT7700, Hitachi, Japan) at voltage of 100 kV. The average diameter of the GO nanoparticles was determined from that of 20 GO nanoparticles by imaging and analysis with Image J software.
